# Supplementary material for: Structure of a two-G-tetrad intramolecular G-quadruplex formed by a variant human telomeric sequence in K+ solution: insights into the interconversion of human telomeric G-quadruplex structures
Source: PubMed Central journal article supplement — Nucleic Acids Res. 2009 Nov 27;38(3):1009–21. doi: 10.1093/nar/gkp1029 (PMC2817458; doi:10.1093/nar/gkp1029), 2009-11-27
Supplement: gkp1029_1.pdf [file gkp1029_1.pdf]

**Structure of a two-G-tetrad intramolecular G-quadruplex formed by a variant human telomeric sequence in  $K^+$  solution: insights into the interconversion of human telomeric G-quadruplex structures**

Zhenjiang Zhang<sup>1,2</sup>, Jixun Dai<sup>1</sup>, Elizabeth Veliath<sup>3</sup>, Roger A. Jones<sup>3</sup>, Danzhou Yang<sup>1, 4, 5, 6\*</sup>

**Supplementary Information**

**Figure S1.** Imino regions of 1D  $^1\text{H}$  NMR spectra of multiple telomeric sequences (Figure 1A) at 20°C, with the assignment of I14-Tel23 and the partial assignment of Tel21-T (based on the numbering system shown in Figure 1A). The assignment of G16 in the A-Tel21-TT sequence (Figure 1A), which has been shown to form the hybrid-2 structure<sup>1</sup>, is also shown. The G10H1 protons of Tel21-T and A-Tel21-T are labeled with asterisks.

**Figure S2.** The imino proton regions of the 1D  $^1\text{H}$  NMR spectra of I14-Tel23 in  $\text{K}^+$  solution in the variable temperature study. The G10H1 proton is labeled with an asterisk.

**Figure S3.** CD melting curves of multiple telomeric sequences (see Figure 1A for sequences) in  $\text{K}^+$  solution monitored at 287 nm.

**Reference:**

1. Dai, J. X.; Carver, M.; Punchihewa, C.; Jones, R. A.; Yang, D. Z., *Nucleic Acids Research* **2007**, 35, (15), 4927-4940.

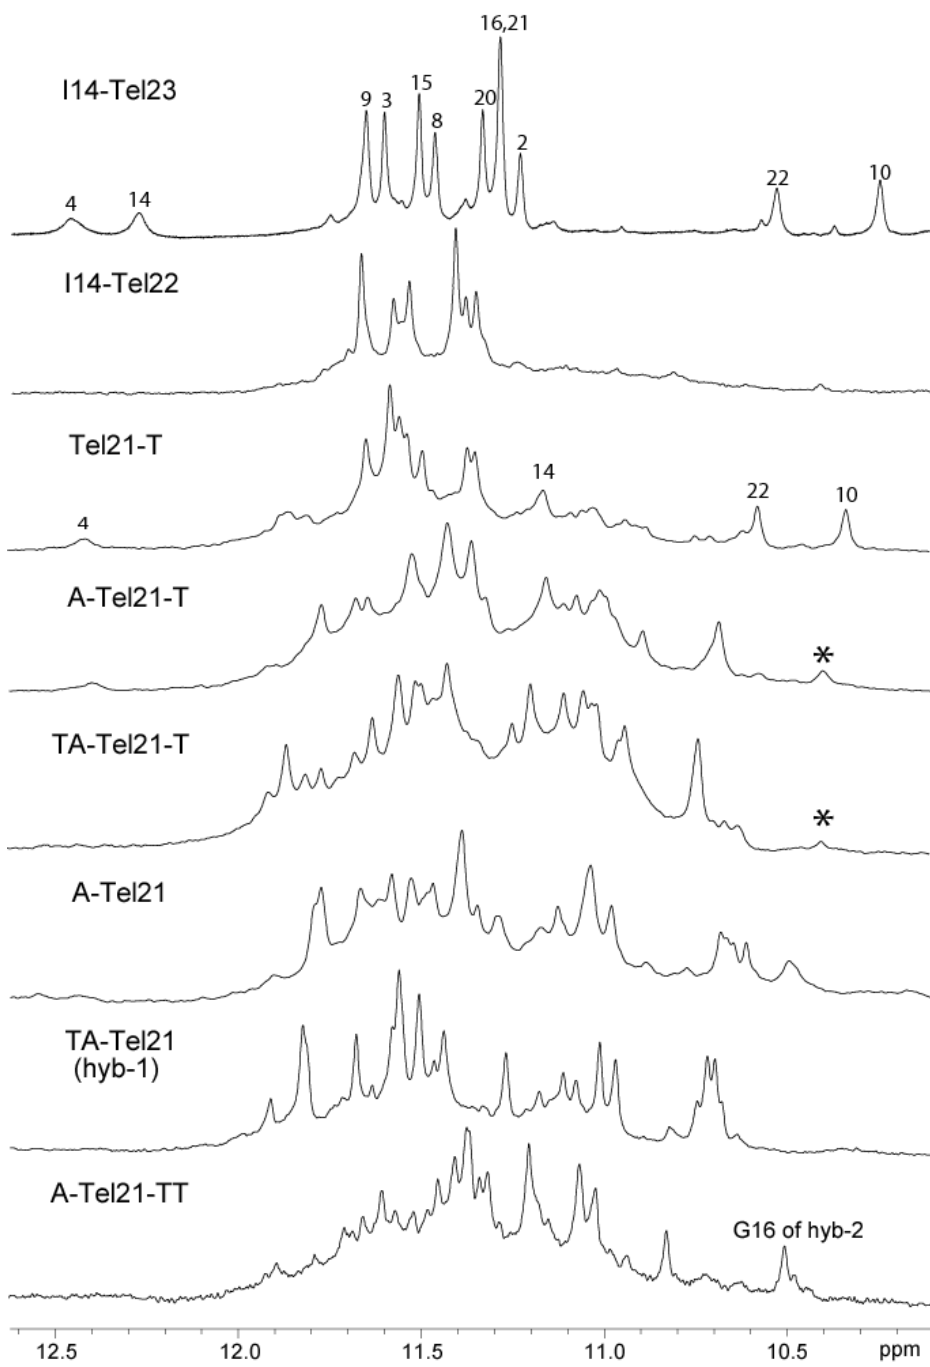

Figure S1.

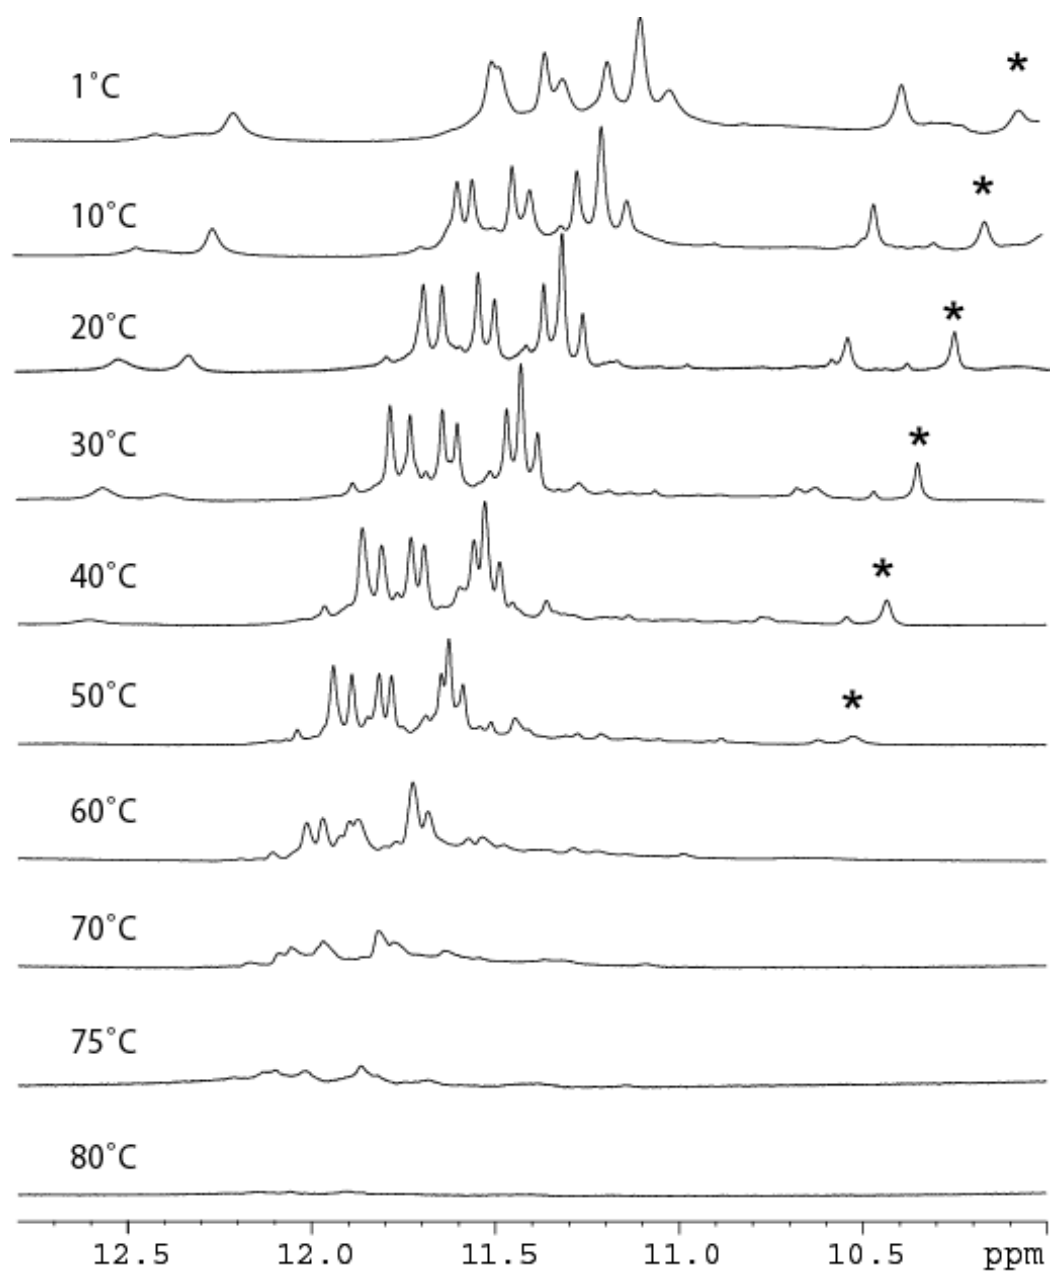

Figure S2.

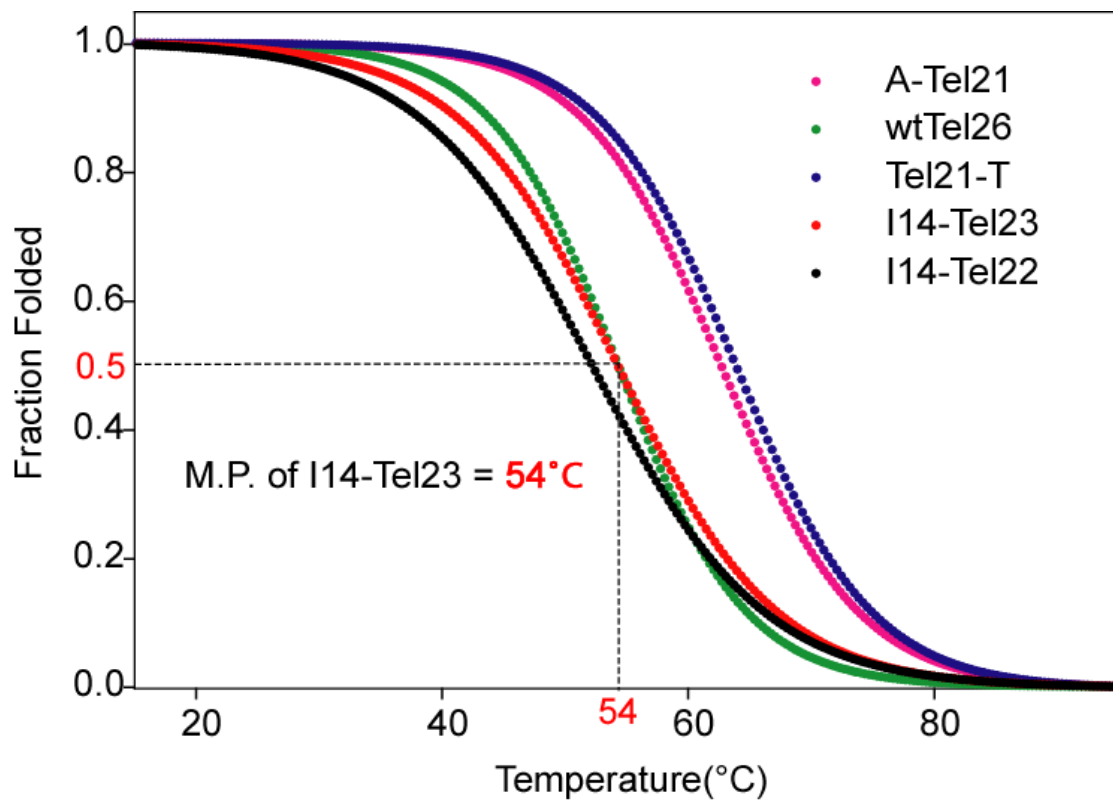

Figure S3.

**Table S1.** Summarized NOE interactions of the loop residues.

| A1  |     | A1   |      |
|-----|-----|------|------|
|     |     | H8   | H1'  |
| I14 | H8  |      | 6.00 |
|     | H1' |      | 5.70 |
| G15 | H8  |      | 5.18 |
|     | H1' |      | 5.40 |
| A13 | H4' | 4.48 | 5.50 |

| G4  |      | G4   |      |      |      |     |      |     |      |
|-----|------|------|------|------|------|-----|------|-----|------|
|     |      | H1   | NH21 | H8   | H1'  | H2' | H2'' | H3' | H4'  |
| G3  | H1   |      | 5.03 |      |      |     |      |     |      |
|     | H8   |      |      | 4.97 |      |     |      |     |      |
|     | H1'  |      |      | 4.36 |      |     |      |     | 4.35 |
|     | H2'  |      |      | 3.73 |      |     |      |     |      |
|     | H2'' |      |      | 3.21 |      |     |      |     |      |
|     | H3'  |      |      | 4.43 |      |     |      |     |      |
|     | H4'  |      |      | 4.49 |      |     |      |     |      |
| T5  | H6   |      |      | 5.3  | 4.53 | 4.2 | 5.1  | 5.3 | 5.93 |
|     | Me   |      |      | 6    | 6    | 5.5 | 5.1  | 5.5 | 5.5  |
|     | H3'  |      |      | 5.5  |      |     |      | 6   |      |
| T6  | Me   |      |      | 5.5  | 4.8  | 4.6 | 5.6  | 6   | 6.2  |
| G16 | H1   | 5.18 |      |      |      |     |      |     |      |
| A19 | H2   | 3.88 | 3.57 |      |      |     |      |     |      |

| T5 |      | T5   |     |     |      |      |     |     |    |
|----|------|------|-----|-----|------|------|-----|-----|----|
|    |      | H6   | Me  | 1'  | 2'   | 2''  | H3' | 4'  | 5' |
| G4 | H8   | 5.3  | 5.3 |     |      |      | 5.5 |     |    |
|    | H1'  | 4.53 | 6   |     |      |      |     |     |    |
|    | H2'  | 4.2  | 5.5 |     |      |      |     |     |    |
|    | H2'' | 5.1  | 5.1 |     |      |      |     |     |    |
|    | H3'  | 5.3  | 5.5 |     |      |      | 6   |     |    |
|    | H4'  | 5.93 | 5.5 |     |      |      |     |     |    |
| T6 | Me   | weak | 6.2 | 5   | weak | weak | 6   |     |    |
|    | H6   | 7.5  |     | 6   | weak | weak |     |     |    |
|    | H4'  |      |     | 5.5 |      |      |     |     |    |
|    | H5'  |      |     | 4.8 |      |      |     |     |    |
| A7 | H2   | 4.61 | 4.5 |     | weak |      |     | 4.6 | 5  |

| T6 |      | T6   |      |      |      |      |      |      |      |
|----|------|------|------|------|------|------|------|------|------|
|    |      | Me   | H6   | H1'  | H2'  | H2'' | H3'  | H4'  | H5'  |
| G4 | H8   | 5.5  |      |      |      |      |      |      |      |
|    | H1'  | 4.8  |      |      |      |      |      |      |      |
|    | H2'  | 4.6  |      |      |      |      |      |      |      |
|    | H2'' | 5.6  |      |      |      |      |      |      |      |
|    | H3'  | 6    |      |      |      |      |      |      |      |
|    | H4'  | 6.2  |      |      |      |      |      |      |      |
| T5 | H6   | weak | 7.5  |      |      |      |      |      |      |
|    | Me   | 6.2  |      |      |      |      |      |      |      |
|    | H1'  | 5    | 6    |      |      |      | 5.5  | 4.8  |      |
|    | H2'  | weak | weak |      |      |      |      |      |      |
|    | H2'' | weak | weak |      |      |      |      |      |      |
| A7 | H2   |      |      | weak |      |      |      |      |      |
|    | H8   |      | 6    | weak | weak | weak | 4.3  | 3.66 | 4.25 |
|    | H1'  |      |      |      |      |      | 5.95 |      |      |

| A7  |      | A7   |      |      |      |     |
|-----|------|------|------|------|------|-----|
|     |      | H2   | H8   | H1'  | H2'' | H3' |
| G3  | H1   | 5.2  |      |      |      |     |
|     | H6   | 4.61 |      |      |      |     |
|     | Me   | weak |      |      |      |     |
|     | 4'   | 4.6  |      |      |      |     |
|     | H2'  | weak |      |      |      |     |
|     | 5'   | 5    |      |      |      |     |
| T5  | Me   | 4.5  |      |      |      |     |
| T6  | H6   |      | 6    |      |      |     |
|     | H1'  | weak | weak |      |      |     |
|     | H2'  |      | weak |      |      |     |
|     | H2'' |      | weak |      |      |     |
|     | H3'  |      | 4.3  |      |      |     |
|     | H4'  |      | 3.66 | 5.95 |      |     |
|     | H5'  |      | 4.25 |      |      |     |
| G8  | H1   |      | 4.44 | 5    | 4.5  | 5.3 |
|     | H8   | 5.05 |      |      |      |     |
|     | H1'  | 5.5  |      |      |      |     |
|     | H3'  |      |      | 4.6  |      |     |
| A19 | H2   | 5.5  |      |      |      |     |
| G20 | H1   |      | 5.44 |      |      |     |

| G10 |      | G10  |      |      |        |      |      |     |     |
|-----|------|------|------|------|--------|------|------|-----|-----|
|     |      | H1   | H8   | H1'  | H2',2" | H3'  | H4'  | H5' | H5" |
| T11 | Me   |      | 5.80 | 4.78 |        | 5.57 | 4.20 |     |     |
|     | H6   |      |      | 3.60 | 4.50   | 5.40 | 4.89 |     |     |
|     | H1'  |      |      |      |        |      |      |     |     |
|     | H2'  | 6.00 |      | 3.39 |        |      |      |     |     |
|     | H2"  | 6.00 |      | 4.20 |        |      |      |     |     |
|     | H3'  |      |      | 4.16 |        |      |      |     |     |
|     | H4'  |      |      |      |        |      |      |     |     |
|     | H5'  |      |      | 4.70 |        |      |      |     |     |
| T12 | Me   |      | 4.60 | 4.80 | 3.96   | 5.00 |      |     |     |
|     | H6   | 4.50 | 5.80 | 5.80 | 6.00   |      |      |     |     |
|     | H1'  | 3.80 |      |      |        |      |      |     |     |
|     | H2'  | 5.29 |      |      |        |      |      |     |     |
|     | H2"  | 5.24 |      |      |        |      |      |     |     |
|     | H3'  | 5.25 |      |      |        |      |      |     |     |
|     | H4'  | 4.00 |      |      |        |      |      |     |     |
|     | H5'* | 4.62 |      |      |        |      |      |     |     |
| G9  | H1'  |      | 4.00 |      |        |      |      |     |     |
|     | H1   | 4.11 |      |      |        |      |      |     |     |
|     | H21  | 5.37 |      |      |        |      |      |     |     |
|     | H22  | 5.25 |      |      |        |      |      |     |     |
|     | H8   |      | 4.87 |      |        |      |      |     |     |
| I14 | H1   | 4.84 |      |      |        |      |      |     |     |
|     | H2   | 6.00 |      |      |        |      |      |     |     |
|     | H8   | 5.50 |      |      |        |      |      |     |     |
| A13 | H1'  | 5.50 |      |      |        |      |      |     |     |
| G22 | H1   | 5.00 | 4.39 |      |        |      |      |     |     |

| T11 |        | T11  |      |      |      |      |      |      |      |
|-----|--------|------|------|------|------|------|------|------|------|
|     |        | Me   | H6   | H1'  | H2'  | H2"  | H3'  | H4'  | H5"  |
| G10 | H1     |      |      |      | 6.00 | 6.00 |      |      |      |
|     | H8     | 5.80 |      |      |      |      |      |      |      |
|     | H1'    | 4.78 | 3.60 |      | 3.39 | 4.20 | 4.16 |      | 4.70 |
|     | H2',2" |      | 4.50 |      |      |      |      |      |      |
|     | H3'    | 5.57 | 5.40 |      |      |      |      |      |      |
|     | H4'    | 4.20 | 4.89 |      |      |      |      |      |      |
| T12 | Me     |      | 5.99 | 5.00 | 4.50 |      | 4.00 | 5.00 |      |
|     | H6     |      |      | 5.46 | 4.50 | 4.00 | 4.04 | 5.67 |      |
|     | H5'    |      |      | 5.00 |      |      |      |      |      |
|     | H5"    |      | 5.80 | 4.80 |      |      |      |      |      |
| I14 | H8     |      | 6.50 | 4.80 | 6.00 | 5.50 |      |      |      |
|     | H1'    |      |      | 6.50 |      |      |      |      |      |



| T12 |         | T12  |      |      |      |      |      |      |      |      |
|-----|---------|------|------|------|------|------|------|------|------|------|
|     |         | Me   | H6   | H1'  | H2'  | H2'' | H3'  | H4'  | H5'  | H5'' |
| G10 | H1      |      | 4.50 | 3.80 | 5.29 | 5.24 | 5.25 | 4.00 | 4.62 |      |
|     | H8      | 4.60 | 5.80 |      |      |      |      |      |      |      |
|     | H1'     | 4.80 | 5.80 |      |      |      |      |      |      |      |
|     | H2',2'' | 3.96 | 6.00 |      |      |      |      |      |      |      |
|     | H3'     | 5.00 |      |      |      |      |      |      |      |      |
| T11 | H6      | 5.99 |      |      |      |      |      |      |      | 5.80 |
|     | Me      |      |      |      |      |      |      |      |      |      |
|     | H1'     | 5.00 | 5.46 |      |      |      |      |      | 5.00 | 4.80 |
|     | H2'     | 4.50 | 4.50 |      |      |      |      |      |      |      |
|     | H2''    |      | 4.00 |      |      |      |      |      |      |      |
|     | H3'     | 4.00 | 4.04 |      |      |      |      |      |      |      |
| A13 | H8      |      | 5.48 | 4.80 | 4.17 | 3.50 | 4.40 | 5.81 |      |      |
|     | H4'     |      |      | 4.96 |      |      |      |      |      |      |
| I14 | H1      |      | 5.68 | 5.42 |      |      |      | 4.66 |      |      |
|     | H8      |      |      |      |      |      |      | 5.00 | 4.80 |      |

| A13 |      | A13  |      |      |         |
|-----|------|------|------|------|---------|
|     |      | H8   | H1'  | H4'  | H5',5'' |
| A1  | H8   |      |      | 4.48 |         |
|     | H1'  |      |      | 5.50 |         |
| G10 | H1   |      | 5.50 |      |         |
| T12 | H6   | 5.48 |      |      |         |
|     | H1'  | 4.80 |      | 4.96 |         |
|     | H2'  | 4.17 |      |      |         |
|     | H2'' | 3.50 |      |      |         |
|     | H3'  | 4.40 |      |      |         |
|     | H4'  | 5.81 |      |      |         |

| I14 |      | I14  |      |      |      |      |
|-----|------|------|------|------|------|------|
|     |      | H1   | H8   | H1'  | H2   | H2'' |
| A1  | H1'  |      | 6.00 | 5.70 |      |      |
| G2  | H1'  | 5.00 |      |      | 5.50 |      |
|     | H21  |      |      |      | 5.90 |      |
|     | H22  | 5.23 |      |      | 5.60 | 5.01 |
| G10 | H1   | 4.84 | 5.50 |      | 6.00 |      |
| T11 | H6   |      | 6.50 |      |      |      |
|     | H1'  |      | 4.80 | 6.50 |      |      |
|     | H2'  |      | 6.00 |      |      |      |
|     | H2'' |      | 5.50 |      |      |      |
| T12 | H6   | 5.68 |      |      |      |      |
|     | H1'  | 5.42 |      |      |      |      |
|     | H4'  | 4.66 | 5.00 |      |      |      |
|     | H5'' |      | 4.80 |      |      |      |
| G15 | H1'  |      |      |      | 4.00 |      |
|     | H8   |      | 5.50 | 4.99 | 6.00 |      |

| T17 |         | T17  |      |      |      |      |      |      |      |
|-----|---------|------|------|------|------|------|------|------|------|
|     |         | Me   | H6   | H1'  | H2'  | H2'' | H3'  | H4'  | H5'' |
| G16 | H1      | 5.98 |      |      |      |      |      |      |      |
|     | H8      |      | 6    |      | 5.8  | 5.61 |      |      |      |
|     | H1'     | 4.32 | 4.46 |      |      |      |      |      |      |
|     | H2',2'' | 5.1  | 4.31 |      |      |      |      |      |      |
|     | H3'     | 6    | 4.83 |      |      |      |      |      |      |
|     | H4'     | 4.25 | 4.3  |      |      |      |      |      |      |
|     | H5'     | 5.3  |      |      |      |      |      |      |      |
| T18 | Me      |      | 6.57 | 4.3  | 4.5  | 4.3  | 5    | 5.2  | 5.86 |
|     | H2''    |      |      |      |      |      | 5    |      |      |
|     | H3'     |      |      | 6    |      |      |      |      |      |
|     | H6      |      |      | 5.04 | 5.14 | 5    | 4.51 | 5.48 |      |
| A19 | H8      |      |      |      | 5.7  |      |      |      |      |

| T18 |      | T18  |      |      |      |      |      |
|-----|------|------|------|------|------|------|------|
|     |      | Me   | H6   | 1'   | 2'   | 2''  | 3'   |
| T17 | H6   | 6.57 |      |      |      |      |      |
|     | H1'  | 4.3  | 5.04 |      |      |      | 6    |
|     | H2'  | 4.5  | 5.14 |      |      |      |      |
|     | H2'' | 4.3  | 5    |      |      |      |      |
|     | H3'  | 5    | 4.51 |      |      | 5    |      |
|     | H4'  | 5.2  | 5.48 |      |      |      |      |
|     | H5'' | 5.86 |      |      |      |      |      |
| A19 | H8   |      | 5.03 | 4.99 | 3.96 | 3.61 | 4.36 |

| A19 |      | A19  |      |      |      |      |      |
|-----|------|------|------|------|------|------|------|
|     |      | H2   | H8   | H1'  | H2'  | H2'' | H3'  |
| G3  | H1   | 4.36 |      |      |      |      |      |
| G4  | H1   | 3.88 |      |      |      |      |      |
|     | NH21 | 3.57 |      |      |      |      |      |
| A7  | H2   | 5.5  |      |      |      |      |      |
| G8  | H1   | 4.9  |      |      |      |      |      |
| G16 | H1   | 4.04 |      |      |      |      |      |
|     | H8   |      | 4    | 5.93 | 4.39 |      | 4.38 |
|     | H1'  |      | 5.53 |      |      |      |      |
|     | H3'  |      | 4.7  |      |      |      |      |
| T17 | H2'  |      | 5.7  |      |      |      |      |
| T18 | H6   |      | 5.03 |      |      |      |      |
|     | H1'  |      | 4.99 |      |      |      |      |
|     | H2'  |      | 3.96 |      |      |      |      |
|     | H2'' |      | 3.61 |      |      |      |      |
|     | H3'  |      | 4.36 |      |      |      |      |
| G20 | H1   | 4    | 5.5  | 3.8  | 4.5  | 4    | 6    |
|     | H21  |      |      | 4.22 |      |      |      |
|     | H22  | 3.99 | 4.52 | 4.42 | 4.51 | 4.1  | 5.28 |

| G22 |      | G22  |      |      |      |      |      |      |
|-----|------|------|------|------|------|------|------|------|
|     |      | H1   | H8   | H1'  | H2'  | H2'' | H3'  | H4'  |
| G9  | H1   | 4.94 |      |      |      |      |      |      |
|     | H2'  | 5.00 |      |      |      |      |      |      |
|     | H2'' | 6.00 |      |      |      |      |      |      |
|     | H8   | 4.50 |      |      |      |      |      |      |
| G10 | H1   | 5.00 |      |      |      |      |      |      |
|     | H8   | 4.39 |      |      |      |      |      |      |
| G21 | H1   | 4.13 |      | 5.35 |      |      |      |      |
|     | H22  | 5.36 |      |      |      |      |      |      |
|     | H1'  |      | 3.36 |      |      |      |      |      |
|     | H2'* |      | 3.20 |      |      |      |      |      |
| T23 | H3'  |      | 4.65 |      |      |      |      |      |
|     | Me   | 5.76 | 4.86 | 5.07 | 4.70 | 4.90 | 4.80 | 5.76 |
|     | H6   |      | 5.50 | 4.30 | 3.20 | 3.00 | 4.20 | 6.54 |
|     | H4'  |      |      | 5.03 |      |      |      |      |
|     | H5'  |      |      | 5.00 |      |      |      |      |
|     | H5'' |      |      | 5.00 |      |      |      |      |

| T23 |      | T23  |      |      |      |      |
|-----|------|------|------|------|------|------|
|     |      | Me   | H6   | H4'  | H5'  | H5'' |
| G22 | H1   | 5.76 |      |      |      |      |
|     | H8   | 4.86 | 5.50 |      |      |      |
|     | H1'  | 5.07 | 4.30 | 5.03 | 5.00 | 5.00 |
|     | H2'  | 4.70 | 3.20 |      |      |      |
|     | H2'' | 4.90 | 3.00 |      |      |      |
|     | H3'  | 4.80 | 4.20 |      |      |      |
|     | H4'  | 5.76 | 6.54 |      |      |      |
